# Supplementary material for: ABBV-319: a CD19-targeting glucocorticoid receptor modulator antibody-drug conjugate therapy for B-cell malignancies
Source: PubMed Central journal article supplement — Blood. 2024 May 6;144(7):757–70. doi: 10.1182/blood.2024023849 (PMC11375461; doi:10.1182/blood.2024023849), 2024-05-06

## 1 **Supplemental Methods**

### 2 *Fluorophore conjugation of antibodies and antibody drug conjugates*

3 Fluorophore-labeled antibodies were conjugated in-house. Briefly, mAbs in PBS were  
4 supplemented with 5% (v/v) 1M Borate Buffer pH 8.5, NHS ester-fluors were solubilized in  
5 DMSO at a concentration of 2mg/mL and added at a molar ratio of 10:1 fluor to mAb, then  
6 incubated at room temperature until the desired degree of labeling was obtained. Labeling was  
7 quenched with 1M Tris buffer pH 8.0 and labeled mAbs were desalted back into PBS via  
8 ZebaSpin 7K MWCO desalting columns. Concentration and degree of labeling were estimated by  
9 UV/Vis according to the manufacturer's instructions.

10

### 11 *Generation of CD19 over-expression cell lines*

12 Cells stably expressing human or cynomolgus CD19 orthologues were generated by lentiviral  
13 transduction. Briefly, lentiviral particles were produced according to the following protocol.  
14 293T cells were plated on 10 cm tissue culture plates in DMEM + 10% FBS and allowed to reach  
15 ~90% confluence the next day. The cells are transfected by mixing 5 µg transfer plasmid, 6 µg  
16 packaging plasmids (TR30037P5, Origene) and 33 µL of Mirus TransIT Reagent (MIR 2700,  
17 Mirus). The transfer plasmid is a bicistronic lentiviral vector (CD513B-1, System Biosciences)  
18 containing the following ORF sequences: human CD19 (NM\_001770.5) or cynomolgus CD19  
19 (XM\_005591541.2). The DNA mixture is then incubated for 30 minutes and then added  
20 dropwise onto 293T cells. The lentiviral particles are collected after 48 hours and 72 hours of  
21 transfection. The lentiviral particles are cleared by centrifugation and concentrated by LentiOX  
22 concentrator (631232, Takara).

23

24 To engineer stable cell lines, cells were transduced with 50  $\mu$ L of concentrated lentiviral particle  
25 in 10  $\mu$ g/ml polybrene (TR-1003-G, Thermo Fisher Scientific). The cells are transduced and then  
26 selected with 2  $\mu$ g/ml puromycin (A1113803, Thermo Fisher Scientific). The expression levels of  
27 the constructs were evaluated by GFP expression via flow cytometry.

28

### 29 *Generation of Glucocorticoid Response Element (GRE) Reporter Cell Lines*

30 The K562 GRE luciferase reporter cell line was generated at AbbVie and have been used to  
31 assess GR activation in structural-activity relationship (SAR) studies for other GRM ADCs.<sup>1,2</sup> The  
32 K562 cells have been transfected with human CD19 (detail described below) for the analysis of  
33 ABBV-319-induced GR activation. Briefly, K562 cells were seeded onto 6-well dish (3516, Costar)  
34 with 2 mL of complete growth medium [RPMI supplemented with L-Glutamine (11835-030,  
35 Thermo Fisher Scientific), 10% FBS (26140-079, Thermo Fisher Scientific), 1% Na Pyruvate  
36 (11360-070, Thermo Fisher Scientific) and 1% MEM NEAA (111140-50, Thermo Fisher Scientific)]  
37 at 500,000 cells per well for 24 hours at 37°C and 5% CO<sub>2</sub>. On the next day, 1.5  $\mu$ g of pGL4.36  
38 [Luc2P/MMTV/Hygro] (E316, Promega), and 3  $\mu$ L of PLUS reagent (10964-021, Thermo Fisher  
39 Scientific) were diluted into 244  $\mu$ L Opti-MEM (31985-070, Thermo Fisher Scientific) and  
40 incubated at room temperature for 15 minutes. After incubation, diluted DNA solution was pre-  
41 incubated with 1:1 Lipofectamine LTX solution (94756, Thermo Fisher Scientific) (13.2  $\mu$ L + 256.8  
42  $\mu$ L Opti-MEM) and incubated at room temperature for 25 minutes to form DNA-Lipofectamine  
43 LTX complexes. After incubation, 500  $\mu$ L of DNA-Lipofectamine complexes were added directly  
44 to the well containing cells. K562 cells were transfected for 24 hours at 37°C and 5% CO<sub>2</sub>. After

45 incubation, cells were washed with 3 mL of PBS and selected with complete growth medium  
46 containing 125 µg/mL of hygromycin B (10687-010, Thermo Fisher Scientific) for two weeks.  
47  
48 K562 pGL4.36[Luc2P/MMTV/Hygro] cells were harvested and seeded into a 15-mL conical tube  
49 (3516, Costar) with 1 mL of complete growth medium (RPMI + L-Glu, 10% FBS, 1% Na Pyruvate  
50 and 1% MEM NEAA) at 250,000 cells per well. 3 µg of human CD19 (RC230267, Origene) and 3  
51 µL of PLUS reagent (10964-021, Thermo Fisher Scientific) were diluted into 244 µL Opti-MEM  
52 (31985-070, Thermo Fisher Scientific) and incubated at room temperature for 5 minutes. After  
53 incubation, diluted DNA solution was pre-incubated with 1:1 Lipofectamine LTX solution (94756,  
54 Thermo Fisher Scientific) (11µL + 239µL Opti-MEM) and incubated at room temperature for 15  
55 minutes to form DNA-Lipofectamine LTX complexes. Subsequently, 500 µL of DNA-  
56 Lipofectamine complexes were added directly to conical tube containing cells. The cells and  
57 DNA-lipofectamine were mixed and seeded into a 6-well dish (3516, Costar) and incubated for  
58 24 hours at 37°C and 5% CO<sub>2</sub>. After 24-hour incubation, the cells were selected with 2 ml  
59 complete growth medium containing 125 µg/mL of hygromycin B (10687-010, Thermo Fisher  
60 Scientific) and 225 µg/mL G418 (10131-027, Thermo Fisher Scientific) for two weeks.

61

### 62 *Internalization assays*

63 One million viable cells were plated onto 96-well U-bottom plates (Corning) and blocked with  
64 5% normal human serum (Sigma-Aldrich) on ice for 30 minutes. After three washes, the cells  
65 were stained with 70 nM LysoTracker (Thermo Fisher Scientific) in staining buffer (PBS + 2% FBS)  
66 for 1 hour at 37°C. The cells were washed and subsequently stained with Alexa Fluor® 647

67 labeled ABBV-319 for 1 hour on ice. A portion of cells were removed for t=0h imaging while  
68 other cells were chased at 37°C for 24 hours before imaging on Amnis ImageStream (Luminex).

69

#### 70 *Immunoblot detection*

71 After transfer, the membranes were incubated with primary antibodies at the manufacturer's  
72 suggested concentration at 4°C overnight. The primary antibodies used in this study include  
73 antibody to phospho-AKT Ser473 (4060, Cell Signaling Technology), BIM (2933, Cell Signaling  
74 Technology), PARP (9532, Cell Signaling Technology), Caspase-3 (9662, Cell Signaling  
75 Technology), and GAPDH (97166, Cell Signaling Technology). The membranes were washed  
76 three times with 1x PBST (9809, Cell Signaling Technology) and subsequently incubated with  
77 Peroxidase AffiniPure Goat Anti-Mouse IgG (H+L) (115-035-003, Jackson ImmunoResearch  
78 Laboratories) or Peroxidase AffiniPure Goat Anti-Rabbit IgG (H+L) (111-035-003, Jackson  
79 ImmunoResearch Laboratories) for 1 hour at room temperature. The membranes were washed  
80 three times with 1x PBST and then incubated with Pierce™ ECL Western Blotting Substrate  
81 (Thermo Fisher Scientific, cat# 32106). The membranes are then detected with Azure Image  
82 Systems C600.

83

#### 84 *RNA-seq analysis*

85 FASTQ files were aligned to hg38 using STAR and then quantified for gene and transcript reads  
86 counts using Salmon, using the reference transcriptome of Ensembl v93. The MultiQC workflow  
87 was conducted to ensure the reads and alignment quality. For treatment conditions of each cell  
88 line, differential expression analysis was performed using edgeR R package. Meta-analysis was

89 performed across cell lines using MetaVolcanoR R package. Pathway enrichment analysis was  
90 performed using GSEA and clusterProfiler R packages. The glucocorticoid response gene  
91 signature using published gene set was computed using ssGSEA method. All plots were  
92 generated using ggplot2 or pheatmap packages.

93

#### 94 *CITE-seq analysis*

95 CITE-seq FASTQ files were processed using cellranger FeatureBarcoding workflow to align reads  
96 for both RNA and protein. The majority of analysis was performed using Seurat V3. QC filtering  
97 kept cells with > 200 gene quantified and mitochondrial gene ratio < 15%. Protein assay data  
98 was additional quality controlled and normalized using dsb package. Doublets were identified  
99 leveraging PBMC lineage marker specificity and removed. Data across different samples were  
100 integrated using Seurat data integration workflow and performed for RNA and protein assay  
101 separately. Joint clustering of RNA and protein was conducted using Seurat  
102 FindMultiModalNeighbors function. After clustering and analysis of cluster markers by  
103 differential expression, cell types were predicted by projecting to human PBMC reference  
104 dataset. Further downstream data analysis and visualization were conducted using Seurat or  
105 ggplot2. Gene signature score of glucocorticoid response genes was computed using CelliD.

106

#### 107 *Cell cycle analysis*

108 One million cells were resuspended in HBSS containing 2% FBS and ice-cold 70% ethanol were  
109 added in a dropwise manner to fix the cells. The cells were incubated on ice for at least 2 hours.

110 After brief wash, cells were resuspended in DAPI working solution (0.1% Triton X-100 and 10  
111  $\mu\text{g}/\text{ml}$  DAPI) and analyzed on the flow cytometer.

112

### 113 *Mouse Pharmacokinetics Study*

114 Whole blood samples diluted 1:5 in Meso Scale Discovery (MSD) assay buffer with EDTA were  
115 analyzed for ABBV-319 in a total anti-human MSD assay with electrochemiluminescent  
116 detection. Total antibody was analyzed by employing a goat anti-human IgG Fc Biotin and a  
117 goat anti human IgG Sulfo-Tag<sup>TM</sup> detection. ABBV-319 was used for the construction of the  
118 standard curves.

119

120 In the assay, samples were analyzed at a 1% final serum concentration. MSD standard curve  
121 fitting and data evaluation was performed using Xlfit4 software (Version 5.5.0). Calibration  
122 curves were plotted from MSD luminescence units versus theoretical standard  
123 concentrations. A four-parameter logistic model was used for curve fitting. The regression  
124 equation for the calibration curves was then used to back calculate the measured  
125 concentrations. The linear range of the total assay was 0.031-7.5  $\mu\text{g}/\text{mL}$ , with a lower limit of  
126 quantitation (LLOQ) of 0.031  $\mu\text{g}/\text{mL}$ . Plates were considered valid when at least two-thirds of  
127 the QCs were within 30% of the expected values.

128

### 129 *In Vivo Pharmacodynamic Analysis*

130 RNA expression was determined using TaqMan<sup>®</sup> Gene Expression quantitative real-time PCR  
131 assay (Thermo Fisher Scientific Inc. Catalog Number: 4331182) for the genes FKBP5, TSC22D3

132 (GILZ), and ZBTB16 (Assay IDs: Hs01561006\_m1, Hs00608272\_m1, and Hs00232313\_m1,  
133 respectively).

134

135 *ADCP Assay*

136 The activity of ABBV-319 on antibody dependent cellular phagocytosis (ADCP) by human  
137 macrophage is determined as described herein.

138

139 Human monocytes (STEMCELL Technologies) were differentiated into macrophages for 8 days in  
140 RPMI-1640 containing 10% FBS and 50 ng/ml of recombinant human M-CSF (BioLegend). Fully  
141 differentiated macrophages were detached from flasks to be co-cultured with target cancer cells  
142 for phagocytosis assays.

143

144 The human Non-Hodgkins Lymphoma cell line Raji and NU-DHL-1 expressing endogenous CD19  
145 were selected as target cells. After washing with PBS, the target cancer cells were labeled with  
146 5  $\mu$ M of CFSE dye solution (Thermo Fisher Scientific) for 15 min, then co-incubated with human  
147 macrophage at 1:1 ratio. Isotype and CD19-targeting antibody and antibody drug conjugate was  
148 added at selected concentrations. After co-culture for 3 hours at 37°C, cells were harvested,  
149 washed and stained with a macrophage maturation marker, Alexa Fluor 647 labeled CD68  
150 antibody (BioLegend), followed by flow cytometry analysis.

151

152 The phagocytosis index representing the population percentile of phagocytosing macrophages  
153 was calculated by counting CFSE<sup>+</sup>CD68<sup>+</sup> double positive macrophages among total CD68<sup>+</sup>  
154 macrophages.

155

#### 156 *CDC assay*

157 Lymphoma cells were plated at 1.25x10<sup>5</sup> cells per well on a 96-well plate (3903, Corning) and  
158 treated with 100 nM of antibody and ADCs for 30 minutes at 37°C. At the end of incubation,  
159 gender unspecified, pooled not filtered, complement preserved human serum (HUMANSRM-  
160 0102105, BioIVT) is added to yield a final serum concentration of 5% and to serve as the  
161 complement source. The cells were incubated for 3 hours at 37°C and then CellTiter-Glo  
162 (G7573, Promega Corporation) reagent is added to assess cell viability. Luminescent intensity  
163 was measured with VICTOR3 Multilabel Plate Reader (Perkin Elmer). Cell viability was plotted  
164 using GraphPad Prism.

165

#### 166 *In Vitro ADCC assay*

167 The ADCC Reporter Bioassay (V and F variants; G7010 and G9790, Promega) were performed  
168 according to the manufacturer's protocol with minor modifications. Briefly, the target cell line  
169 Raji was plated in 5 µL of ADCC assay buffer (RPMI media containing 4% low IgG serum) at 2500  
170 cells per well. The antibody was titrated in ADCC assay buffer and 5 µL were added at indicated  
171 antibody concentration. Effector cells from the V Variant and F Variant kits were resuspended in  
172 ADCC assay buffer and added at 5 µL per well to achieve effector to target cell ratio (E:T) of 6:1.  
173 The target cell-antibody mixtures were incubated with effector cells expressing V variant and F



174 variant at 37°C for 6 hours and 24 hours, respectively. At the endpoint, 15 µL of Bio-Glo  
175 Luciferase Reagents were added and luciferase activity were measure with Molecular Devices  
176 SpectraMax M5 plate reader.  
177  
178 PBMC co-culture ADCC assays were performed as described below. The target cell lines (RS4;11,  
179 Raji and KARPAS422) were washed with PBS and labelled with 1 µM CFSE in PBS (C34554,  
180 Thermo Fisher Scientific) for five minutes at 37°C. The labelled target cells were then washed  
181 three times with media containing 10% FBS. 20,000 labeled target cells in 50 µL are plated onto  
182 V-shaped 96-well plates. Antibodies and ADCs were titrated in culture media and 10 µL were  
183 added to achieve indicated final concentrations. PMBC from normal donor (AllCells) were  
184 added in 40 µL at effector to target cell ratio of 20:1 and the cells were incubated at 37°C for  
185 four hours. After the incubation, the cells are washed once with PBS and stained with  
186 Live/Dead Fixable Violet Dead Cell Stain Kit (L34955, Thermo Fisher Scientific) for 30 minutes at  
187 room temperature and then wash once with 200 µL ice-cold PBS. Cells are fixed with 4%  
188 paraformaldehyde in PBS for 15 minutes and then wash once with 200 µL PBS. The fixed cells  
189 are resuspended in 100 µL PBS and store in 4°C until analysis on Stratedigm S1000EON flow  
190 cytometer. The CFSE-labeled target cells were gated, and the percentage of dead (Live/Dead  
191 Violet dye-positive) cells were captured. The % specific lysis was calculated by subtracting the  
192 percentage of dead cells in each treated condition with the untreated control containing only  
193 effector and target cells.

194

195 *Flow cytometry immunophenotyping*

196 Immunophenotyping of blood samples was performed using high dimensional flow cytometry.  
197 20  $\mu$ L of whole blood was drawn at specific intervals prior to and throughout the treatment  
198 schedule and placed into a well of a 96-well plate. RBCs were lysed using 100  $\mu$ L of ACK lysis  
199 solution (Thermo Fisher Scientific) for 2 minutes at room temperature, and then immediately  
200 quenched with 100  $\mu$ L MACS Running Buffer ("MACS Buffer" - Miltenyi Bio) supplemented with  
201 10% FBS. Quenched samples were centrifuged at 400 x g for 5 minutes and then washed with  
202 200  $\mu$ L PBS to remove serum proteins. Pellets were resuspended in 50  $\mu$ L of a 1:100 dilution of  
203 LIVE/DEAD Fixable Blue Dead Cell Stain (Thermo Fisher Scientific) in PBS and stained for 10  
204 minutes on ice. Samples were preserved using 70  $\mu$ L of proteomic stabilization buffer (Smart  
205 Tube Inc.) added directly to the 50  $\mu$ L sample and incubated for 10 minutes at room  
206 temperature. After the 10-minute incubation, the samples were placed directly into -80°C  
207 storage. All samples throughout the study were prepared in this manner, so that they could be  
208 stained and acquired in a single batch at the end of the study. After all samples had been  
209 processed and cryopreserved for at least 1 week, they were rapidly thawed and washed 2x with  
210 Thaw/Lyse Buffer and then 1x with MACS Buffer. Samples were stained for 30 minutes at 4°C  
211 with a cocktail of conjugated antibodies to identify various immune subsets including CD8 T  
212 cells and NK cells. The full list of antibodies including clone, fluor and dilutions can be found in  
213 Supplemental Table 3. Stained samples were washed 2x with MACS buffer, fixed and  
214 permeabilized using the FoxP3 Transcription Buffer set (Thermo Fisher Scientific) according to  
215 the manufacturers protocol. Permeabilized samples were stained for intracellular targets  
216 overnight at 4°C, washed with Perm/Wash buffer, and resuspended in a final volume of 100  $\mu$ L  
217 prior to being acquired on a BD Fortessa cytometer (standard 5-Laser configuration). Analysis of

218 the FCS files was done in OMIQ using a hierarchical gating strategy that included gates on live  
219 cells, single cells, and human CD45+ cells. Percent B cells (CD20+ and CD19+) was calculated  
220 based on total human CD45+ cells present whereas percent T cells (CD3+, CD56-) and percent  
221 NK cells (CD3-, CD56+) were calculated based on the total number of human CD45+ cells minus  
222 the number of B cells. Since the depletion of B cells was obvious among the treatment groups,  
223 the frequency of all other populations would be artificially high based on total CD45+. Thus, the  
224 B cell component was removed from these measurements to assess whether they were  
225 changing in frequency.

226

#### 227 *CD19 Receptor Quantification by Flow Cytometry*

228 Cell lines were stained with a CD19-PE antibody (clone HIB19; Thermo Fisher Scientific) to assess  
229 antigen copy number. Samples were first stained for viability using the Fixable LIVE/DEAD NIR  
230 stain, (Thermo Fisher Scientific) followed by an 8-point two-fold serial dilution with a top  
231 concentration of 2 µg/mL on each line to ensure receptor saturation. Samples were stained on  
232 ice for 30 minutes, washed 2x with MACS Buffer, and then acquired on the Agilent Quanteon  
233 Flow Cytometer (standard configuration). Greater than 20,000 live single cells were collected.  
234 Using the same instrument setup, Quantibrite-PE beads were acquired according to the  
235 manufacturer's instructions (BD Biosciences). Samples were analyzed in OMIQ by gating on live,  
236 single cells, and then exporting the median fluorescence intensity (MedFI) of the PE channel for  
237 each. Quantibrite-PE MedFI values were used to create a linear regression line ( $R^2 = 0.9997$ ),  
238 and MedFI values from saturating data points of each cell line's PE expression were plugged into  
239 the equation to yield a CD19 copy number for each cell line (supplemental Table 2).

240

241 *GR Relative Expression via Flow Cytometry*

242 Cell lines were stained for expression of the glucocorticoid receptor (GR). Harvested cell lines  
243 were stained using the LIVE/DEAD NIR viability stain for 15 minutes and then washed with  
244 MACS Buffer. Cell pellets were resuspended in 100  $\mu$ L of freshly prepared 4% paraformaldehyde  
245 and incubated at room temperature for 15 minutes. Samples were washed 2x with MACS buffer  
246 and resuspended in the residual volume. They were permeabilized by slowly adding 200  $\mu$ L of  
247 ice-cold 90% methanol and incubated for 20 minutes at  $-20^{\circ}\text{C}$ . Permeabilized samples were  
248 washed and stained with anti-GR Alexa Fluor 488 (Cell Signaling Technologies) antibody for 30  
249 minutes. Finally, samples were washed 2x with MACS, and 20,000 live, single events were  
250 acquired on the Quanteon. In OMIQ, live, single cells were gated and then Alexa Fluor 488  
251 channel MedFI values were exported for each sample. A GR knockout cell line was used as a  
252 negative control. Each cell line was run with and without GR staining but processed the same in  
253 all other regards. To normalize the impact of autofluorescence of the various cell lines, a fold-  
254 change increase of GR stained over the paired unstained MedFI value was calculated. Next, the  
255 fold-change value of the GR knockout cell line was subtracted from the fold-change value of all  
256 the other cell lines to account for non-specific antibody background staining. The final fold  
257 change values are representative of normalized, background subtracted, fold-change values  
258 which can be interpreted as relative GR expression of the given cell line (supplemental Table 2).

259

260 *Flow cytometric binding assays*

261 Adherent cells were first detached by Versene solution (15040066, Thermo Fisher Scientific).  
262 Cells were washed with the FACS buffer (PBS + 2% FBS) and blocked with BD human Fc block  
263 (564219, BD Biosciences) at room temperature for 10 minutes. Cells were stained with Alexa  
264 Fluor 647-labelled antibody and ADC for 30-minute on ice. After washes, cells were stained with  
265 Live/Dead Fixable Violet Dead Cell Stain Kit (L34955, Thermo Fisher Scientific) according to the  
266 manufacturers' suggested protocol. Cells were then fixed with 4% paraformaldehyde in PBS for  
267 15 minutes on ice. After washes, fixed cells were analyzed with BD FACSCanto flow cytometer.  
268  
269 Surface plasma resonance assay  
270 Affinity of Af. CD19 mAb and ABBV-319 for FcγRIIIa (V158 and F158) were measured by Biacore-  
271 8K. Briefly, Anti-histidine antibody was immobilized on CM5 chip via amine capture. Histidine-  
272 tagged FcγRIIIa (V158 and F158) were captured. Antibodies at various concentrations were then  
273 injected over the flow cell. After each injection of analyte, the chip surface was regenerated  
274 with 10 mM glycine-HCl, pH 1.5. Sensorgrams were fit with a 1:1 Langmuir binding model in  
275 Biacore T200 Evaluation Software.  
276

277 **References for Supplemental Methods**

- 278 1. Hobson AD, McPherson MJ, Hayes ME, et al. Discovery of ABBV-3373, an Anti-TNF Glucocorticoid  
279 Receptor Modulator Immunology Antibody Drug Conjugate. *J Med Chem.* 2022;65(23):15893-15934.  
280 2. Hobson AD, Xu J, Welch DS, et al. Discovery of ABBV-154, an anti-TNF Glucocorticoid Receptor  
281 Modulator Immunology Antibody-Drug Conjugate (iADC). *J Med Chem.* 2023;66(17):12544-12558.

282

283 **Supplemental Table and Figure Legends**

284

285 **Supplemental Table 1.** Cell lines from in the *in vitro* screen and their NHL subtypes and culture  
286 conditions

287

288 **Supplemental Table 2.** EC<sub>50</sub> and E<sub>max</sub> from the in vitro screen of GRM payload, prednisolone,  
289 dexamethasone, Isotype mAb ADC, Af. CD19 mAb, and ABBV-319 across malignant B-cell lines.  
290 CD19 and GR expression are displayed for each cell line.

291

292 **Supplemental Table 3.** Antibodies used for flow cytometric immunophenotyping, GR  
293 quantitation and GR expression analysis.

294

295 **Supplemental Table 4.** Equilibrium constant (K<sub>D</sub>) from Surface Plasma Resonance (SPR)

296

297 **Supplemental Figure 1. Species cross-reactivity of ABBV-319.** (A-C) Flow cytometric binding  
298 analysis of Alexa Fluor 647-labeled antibody and ADC on parental 293T (A), 293T expressing  
299 human CD19 (B), and 293T expressing cynomolgus monkey CD19 (C). Means ± SEM are shown.  
300 (D-E) The activation of GRE reporter after treatment with indicated doses of ABBV-319 in K562  
301 GRE reporter cell line over-expressed with human CD19 (D) or cynomolgus monkey CD19 (E).  
302 Means ± SEM are shown.

303

304 **Supplemental Figure 2. Correlation analysis between EC50 and target expression.** (A) A plot of  
305 GRM small molecule EC<sub>50</sub> versus GR expression from flow cytometric analysis. (B) A plot of  
306 ABBV-319 EC50 versus GR expression from flow cytometric analysis. (C) A plot of ABBV-319 EC50  
307 versus CD19 expression from flow cytometric analysis. (D) A plot of ABBV-319 EC50 versus CD19  
308 expression from flow cytometric analysis with only the GRM-sensitive cell lines. Spearman  
309 correlation coefficients and p-values from the Spearman correlation analysis are shown.

310

311 **Supplemental Figure 3. Signaling analysis of GRM/ABBV-319 resistant cell lines.** (A) SU-DHL-4  
312 cells were pre-treated with 100 nM Af. Isotype mAb or Af. CD19 mAb for an hour and then  
313 stimulated with 1 µg/ml anti-IgM for indicated time. Cell lysates were resolved on SDS-PAGE and  
314 immunoblot analysis for phospho-AKT (Ser473) and GAPDH are displayed. GAPDH is used as the  
315 loading control. (B) Immunoblot analysis of BIM, cleaved caspase 3, PARP and beta-actin after  
316 treating SU-DHL-8 with 10 nM GRM payload and 100 nM ABBV-319 for indicated time. SU-DHL-8  
317 treated with 10 nM GRM for 48h were used as the positive control. (C) Cell cycle analysis of SU-  
318 DHL-8 after treatment with 10 nM GRM and 100 nM ABBV-319 for indicated time. The % of cells  
319 from sub-G1, G0-G1, S and G2-M phases of cell cycle are displayed.

320

321 **Supplemental Figure 4. Supplemental data for the CDX *in vivo* data.** (A) A table summarizing *in*  
322 *vivo* efficacy of ABBV-319 in different CDX models. The cancer indication for different CDX

323 models is shown. The maximal tumor growth inhibition (% TGI Max) and tumor growth delay  
324 (TGD) are displayed for single-dose 15 mg/kg of ABBV-319 treatment in NSG or CB17 SCID mice.  
325 (B) Growth of xenografted SUP-B15 tumors in NSG mice after indicated treatment regimen. SD  
326 denotes single dose. Means  $\pm$  SEM of tumor volume were plotted for each treatment group  
327 versus days from randomization. (C) Growth of xenografted SU-DHL-6 tumors in SCID-beige mice  
328 after indicated treatment regimen. QD denotes daily treatment and SD denotes single dose.  
329 Means  $\pm$  SEM of tumor volume were plotted for each treatment group versus days from  
330 randomization. (D) Total antibody detected in the mouse whole blood from the SU-DHL-6 study  
331 (C). Means  $\pm$  SEM are shown.

332

333 **Supplemental Figure 5. ABBV-319 induces antibody-dependent cellular phagocytosis (ADCP)**

334 **but not complement-dependent cytotoxicity (CDC).** (A-B) Fold change in phagocytic index  
335 compared to vehicle control are displayed for Raji (A) and NU-DHL-1 (B) cells after treatment  
336 with 200 nM of indicated agents in presence of *in vitro* differentiated macrophages. Mean  $\pm$   
337 SEM are displayed. (C) Phagocytic indexes are displayed for Raji after treatment with dose-  
338 titrated isotype-GRM ADC and ABBV-319. Means  $\pm$  SEM are shown. Detailed protocols  
339 describing the ADCP assay and definition of phagocytic index are included in Supplemental  
340 Methods section. (D-F) Complement-dependent cytotoxicity assay after the treatment of Raji  
341 (D), Ramos (E), and SU-DHL-6 (F) with 100 nM of indicated agents in presence of complements  
342 for 3 hours. Means  $\pm$  SEM are shown. Statistical significance is determined with one-way  
343 ANOVA, with Dunnett's multiple comparison test. ns, not significant. \*\*\*\*p<0.0001.

344



# Supplemental Table 1

| Cell Line  | Cancer Type | Culture Media                |
|------------|-------------|------------------------------|
| SUDHL2     | ABC DLBCL   | IMDM + 10% HS                |
| TMD8       | ABC DLBCL   | RPMI + 10% FBS + 1% pyruvate |
| U2932      | ABC DLBCL   | IMDM + 10% HS                |
| OCI-LY3    | ABC DLBCL   | IMDM + 10% HS                |
| HBL-1      | ABC DLBCL   | IMDM + 10% HS                |
| Ri1        | ABC DLBCL   | IMDM + 10% HS                |
| OCI-LY2    | GCB DLBCL   | IMDM + 10% HS                |
| HT         | GCB DLBCL   | IMDM + 10% HS                |
| SU-DHL-10  | GCB DLBCL   | IMDM + 10% HS                |
| OCI-LY19   | GCB DLBCL   | IMDM + 10% HS                |
| Sudhl-8    | GCB DLBCL   | IMDM + 10% HS                |
| Pfeiffer   | GCB DLBCL   | IMDM + 10% HS                |
| OCI-LY8    | GCB DLBCL   | IMDM + 10% HS                |
| OCI-LY1    | GCB DLBCL   | IMDM + 10% HS                |
| OCI-LY18   | GCB DLBCL   | IMDM + 10% HS                |
| Karpas-422 | GCB DLBCL   | RPMI + 20% FBS               |
| OCI-LY7    | GCB DLBCL   | IMDM + 10% HS                |
| SU-DHL-6   | GCB DLBCL   | IMDM + 10% HS                |
| SU-DHL-4   | GCB DLBCL   | IMDM + 10% HS                |
| DB         | GCB DLBCL   | RPMI + 10% FBS               |
| WSU-DLCL2  | FL          | RPMI + 10% FBS               |
| DOHH-2     | FL          | RPMI + 10% FBS               |
| SC-1       | FL          | RPMI + 10% FBS               |
| REC-1      | MCL         | RPMI + 10% FBS               |
| Granta-519 | MCL         | MEM + 10% FBS                |
| Mino       | MCL         | RPMI + 20% FBS               |
| Z-138      | MCL         | IMDM + 10% HS                |
| JVM-2      | MCL         | RPMI + 10%FBS                |
| Jeko       | MCL         | RPMI + 20% FBS               |
| Farage     | GCB DLBCL   | RPMI + 20% FBS               |
| Raji       | BL          | RPMI + 10% FBS               |
| NU-DHL-1   | GCB DLBCL   | IMDM + 10% HS                |
| RS4;11     | ALL         | RPMI + 10% FBS               |
| SUP-B15    | ALL         | IMDM + 20 FBS                |

| Cell Line  | Cancer Type | CD19 Expression (ABC) | GR Expression | Rearrangement |       | n | GRM                   |                      | Dexamethasone         |                      | Prednisolone          |                      | Isotype mAb           |                      | AF-CD19 mAb           |                      | ABV-319               |                      |
|------------|-------------|-----------------------|---------------|---------------|-------|---|-----------------------|----------------------|-----------------------|----------------------|-----------------------|----------------------|-----------------------|----------------------|-----------------------|----------------------|-----------------------|----------------------|
|            |             |                       |               | MYC           | BCL 2 |   | EC <sub>50</sub> (µM) | E <sub>max</sub> (%) |
| Raji       | BL          | 27283.0               | 58.4          |               |       | 3 | >0.1                  | 57.4                 | >1                    | 33.0                 | >10                   | 34.7                 | >1                    | 52.6                 | >1                    | 18.7                 | >1                    | 8.5                  |
| HT         | GCB DLBCL   | 35061.5               | 13.4          |               |       | 2 | 0.00033               | 31.7                 | 0.008                 | 30.9                 | 0.13                  | 28.7                 | >1                    | 16.9                 | >1                    | 2.5                  | >1                    | 16.9                 |
| Ri-1       | ABC DLBCL   | 5161.6                | 1170.8        | + Non-Ig      | +     | 4 | 0.00089               | 34.5                 | 0.062                 | 36.5                 | 1.42                  | 41.4                 | >1                    | 0.2                  | >1                    | 8.5                  | >1                    | 36.5                 |
| Pfeiffer   | GCB DLBCL   | 20356.0               | 32.7          |               |       | 4 | 0.00097               | 34.8                 | 0.011                 | 41.5                 | 0.30                  | 45.9                 | >1                    | 12.0                 | >1                    | 3.4                  | >1                    | 15.6                 |
| OCI-LY3    | ABC DLBCL   | 1.0                   | 37.4          |               |       | 2 | 0.00144               | 36.5                 | 0.034                 | 42.7                 | 0.12                  | 29.8                 | >1                    | 5.8                  | >1                    | 8.2                  | >1                    | 21.6                 |
| U-2932     | ABC DLBCL   | 11037.4               | 307.3         |               |       | 4 | 0.00206               | 48.7                 | 0.010                 | 46.3                 | 0.08                  | 40.5                 | >1                    | 8.3                  | >1                    | 17.9                 | >1                    | 67.2                 |
| Sc-1       | FL          | 4122.9                | 38.9          | + IG          | +     | 2 | >0.1                  | -5.8                 | >1                    | 26.5                 | >10                   | -23.5                | >1                    | 16.4                 | >1                    | 26.8                 | >1                    | 36.0                 |
| WSU-DLCL2  | FL          | 11706.8               | 36.9          | + Non-Ig      | +     | 2 | >0.1                  | -1.2                 | >1                    | -3.5                 | >10                   | -1.4                 | >1                    | 5.7                  | >1                    | 12.3                 | >1                    | 34.7                 |
| OCI-LY8    | GCB DLBCL   | 38186.3               | 27.6          | + IG          | +     | 2 | >0.1                  | 26.3                 | >1                    | 31.4                 | >10                   | 18.7                 | >1                    | 34.9                 | >1                    | 58.7                 | >1                    | 32.9                 |
| SU-DHL-2   | ABC DLBCL   | 12.1                  | 2.8           |               |       | 2 | >0.1                  | 9.1                  | >1                    | 10.0                 | >10                   | 1.1                  | >1                    | 4.1                  | >1                    | 0.9                  | >1                    | 14.5                 |
| SU-DHL-8   | GCB DLBCL   | 23596.5               | 27.0          |               |       | 2 | >0.1                  | 15.4                 | >1                    | 21.8                 | 7.31                  | 23.8                 | >1                    | 11.0                 | >1                    | 8.2                  | >1                    | 12.4                 |
| SU-DHL-4   | GCB DLBCL   | 7835.7                | 43.2          | + Non-Ig      | +     | 2 | >0.1                  | 7.2                  | >1                    | 9.1                  | >10                   | 6.8                  | >1                    | 16.1                 | >1                    | 5.3                  | >1                    | 10.2                 |
| Z-138      | MCL         | 484.1                 | 94.3          |               |       | 2 | >0.1                  | 3.4                  | >1                    | 7.4                  | >10                   | 6.7                  | >1                    | 2.2                  | >1                    | 3.6                  | >1                    | 8.0                  |
| Granta-519 | MCL         | 41118.9               | 464.0         |               |       | 2 | >0.1                  | -10.8                | >1                    | -7.4                 | >10                   | -5.6                 | >1                    | 3.5                  | >1                    | 11.6                 | >1                    | 6.3                  |
| SU-DHL-10  | GCB DLBCL   | 10813.9               | 278.7         | + IG          | +     | 2 | >0.1                  | 15.4                 | >1                    | 21.4                 | >10                   | 5.0                  | >1                    | 14.2                 | >1                    | 31.3                 | >1                    | 1.0                  |
| Mino       | MCL         | 54656.4               | 164.0         |               |       | 2 | >0.1                  | -0.6                 | >1                    | -1.8                 | >10                   | 1.8                  | >1                    | 5.0                  | >1                    | 2.8                  | >1                    | 0.7                  |
| RS4-11     | ALL         | 113.9                 |               |               |       | 2 | 0.10000               | 98.2                 |                       |                      |                       |                      | >1                    | 0.5                  | >1                    | -2.3                 | 0.82                  | 95.5                 |
| Jeko-1     | MCL         | 7490.0                | 17.7          |               |       | 2 | 0.00023               | 57.3                 | 0.003                 | 55.6                 | 0.04                  | 48.4                 | >1                    | 12.7                 | 0.5                   | 21.1                 | 0.77374               | 54.3                 |
| OCI-LY18   | GCB DLBCL   | 16498.3               | 55.1          | + IG          | +     | 4 | 0.00087               | 53.4                 | 0.009                 | 55.9                 | 0.17                  | 56.1                 | >1                    | 5.9                  | >1                    | 8.6                  | 0.65911               | 45.0                 |
| OCI-LY2    | GCB DLBCL   | 29413.2               | 26.3          |               |       | 2 | >0.1                  | 7.6                  | >1                    | 7.1                  | >10                   | 6.7                  | >1                    | 11.8                 | 0.5                   | 21.6                 | 0.50023               | 24.5                 |
| REC-1      | MCL         | 30832.1               | 8.4           |               |       | 2 | 0.00077               | 93.5                 | 0.010                 | 99.0                 | 0.27                  | 90.7                 | >1                    | 1.4                  | >1                    | -2.9                 | 0.34947               | 31.0                 |
| HBL-1      | ABC DLBCL   | 1435.4                | 267.3         |               |       | 2 | 0.00041               | 76.9                 | 0.006                 | 82.9                 | 0.05                  | 76.3                 | >1                    | 8.3                  | >1                    | 11.9                 | 0.34099               | 61.0                 |
| SUP-B15    | ALL         | 109.3                 |               |               |       | 2 | 0.089                 | 98.4                 |                       |                      |                       |                      | >1                    | -0.4                 | >1                    |                      | 0.32                  | 96.5                 |
| OCI-LY1    | GCB DLBCL   | 11730.1               | 217.0         |               |       | 2 | 0.00155               | 75.4                 | 0.019                 | 77.5                 | 0.20                  | 74.2                 | >1                    | 19.1                 | >1                    | 12.1                 | 0.27782               | 53.7                 |
| DoHH-2     | FL          | 39106.2               | 155.5         | + IG          | +     | 4 | 0.00018               | 88.4                 | 0.006                 | 84.4                 | 0.03                  | 69.3                 | >1                    | 20.5                 | >1                    | 52.2                 | 0.17384               | 84.1                 |
| OCI-LY19   | GCB DLBCL   | 32910.0               | 148.0         | + Non-Ig      | +     | 2 | 0.00034               | 100.5                | 0.008                 | 102.5                | 0.10                  | 99.7                 | >1                    | 29.9                 | >1                    | 35.3                 | 0.05539               | 94.7                 |
| TMD-8      | ABC DLBCL   | 9145.5                | 17.3          |               |       | 4 | 0.00006               | 74.6                 | 0.002                 | 79.3                 | 0.01                  | 70.2                 | >1                    | 52.7                 | 0.506                 | 66.1                 | 0.04463               | 86.4                 |
| DB         | GCB DLBCL   | 6.2                   | 531.3         | + Non-Ig      | +     | 2 | 0.00115               | 94.2                 | 0.013                 | 97.0                 | 0.13                  | 78.4                 | >1                    | 17.0                 | >1                    | 6.7                  | 0.02991               | 94.5                 |
| NIU-DHL-1  | GCB DLBCL   | 283349.3              | 52.2          | + Non-Ig      | +     | 3 | 0.00008               | 63.6                 | 0.004                 | 64.8                 | 0.07                  | 62.8                 | >1                    | 19.4                 | 0.006                 | 46.5                 | 0.02730               | 57.9                 |
| Farage     | GCB DLBCL   | 69514.2               | 75.8          |               |       | 8 | 0.00017               | 76.5                 | 0.003                 | 82.6                 | 0.03                  | 74.5                 | >1                    | 26.0                 | >1                    | 37.5                 | 0.00392               | 82.5                 |
| KARRAS422  | GCB DLBCL   | 85847.9               | 54.1          |               |       | 2 | 0.00002               | 113.0                | 0.001                 | 114.5                | 0.01                  | 96.9                 | >1                    | 11.3                 | >1                    | -46.2                | 0.00117               | 77.9                 |
| SU-DHL-6   | GCB DLBCL   | 3179.6                | 15.1          | + Non-Ig      | +     | 3 | 0.00029               | 62.8                 | 0.016                 | 72.9                 | 0.16                  | 72.2                 | >1                    | 5.9                  | 3E-05                 | 85.8                 | 0.00003               | 90.0                 |
| JVM-2      | MCL         | 5460.1                | 37.2          |               |       | 2 | 0.00002               | 53.7                 | 0.001                 | 51.0                 | 0.01                  | 53.8                 | >1                    | 6.0                  | 4E-05                 | 58.1                 | 0.00003               | 67.1                 |
| OCI-LY7    | GCB DLBCL   | 15557.7               | 25.8          |               |       | 4 | 0.0045                | 57.5                 | 0.104                 | 69.3                 | 3.462                 | 50.5                 | >1                    | 11.0                 | >1                    | 29.5                 | 0.00002               | 53.9                 |

### Supplemental Table 3

| <b>Specificity</b> | <b>Clone</b> | <b>Fluor</b>    | <b>Manufacturer</b>         | <b>Experiment</b> |
|--------------------|--------------|-----------------|-----------------------------|-------------------|
| CD16               | 3G8          | BUV 496         | BD Biosciences              | Immunophenotyping |
| CD19               | HIB19        | BV 605          | BioLegend                   | Immunophenotyping |
| CD20               | 2H7          | BV711           | BioLegend                   | Immunophenotyping |
| CD3                | OKT3         | APC-Fire 750    | BioLegend                   | Immunophenotyping |
| CD4                | SK3          | BUV 805         | BD Biosciences              | Immunophenotyping |
| CD45               | HI30         | BUV 395         | BD Biosciences              | Immunophenotyping |
| CD56               | HCD56        | BV421           | BioLegend                   | Immunophenotyping |
| CD8a               | RPA-T8       | AF700           | BioLegend                   | Immunophenotyping |
| Live/Dead          | N/A          | Blue            | Invitrogen                  | Immunophenotyping |
| CD19               | HIB19        | PE              | BD Biosciences              | CD19 Quantitation |
| GR                 | D8H2         | Alexa Fluor 488 | Cell Signaling Technologies | GR Expression     |

## Supplemental Table 4

$K_D$  ( $\mu$ M)

|                                        | <b>Af. CD19 mAb</b> | <b>ABBV-319</b> |
|----------------------------------------|---------------------|-----------------|
| <b>Fc<math>\gamma</math>RIIIa F158</b> | 0.062               | 0.052           |
| <b>Fc<math>\gamma</math>RIIIa V158</b> | 0.047               | 0.041           |

# Supplemental Figure 1

**A**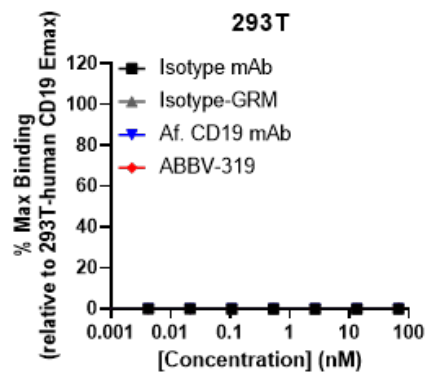**B**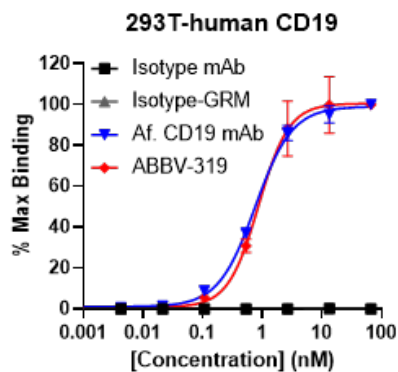**C**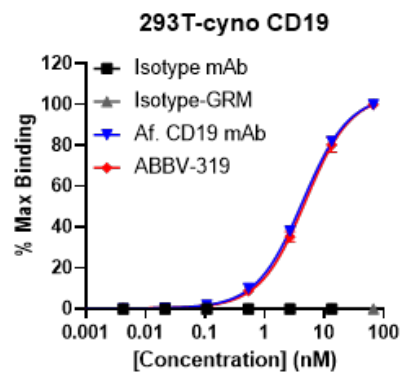**D**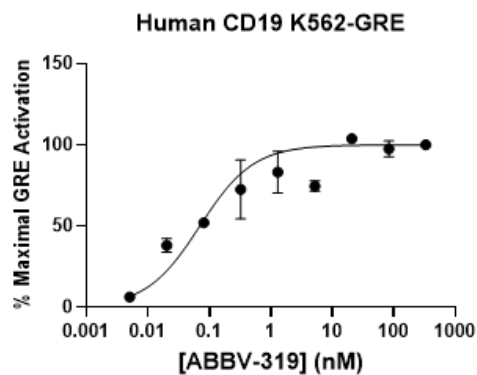**E**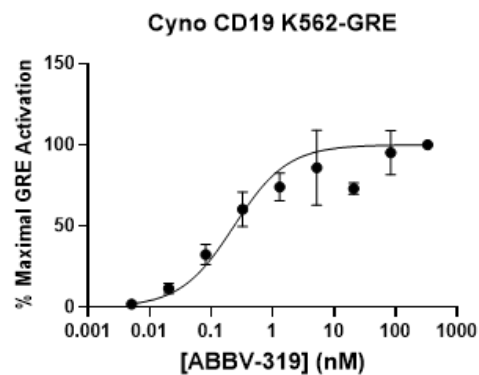

## Supplemental Figure 2

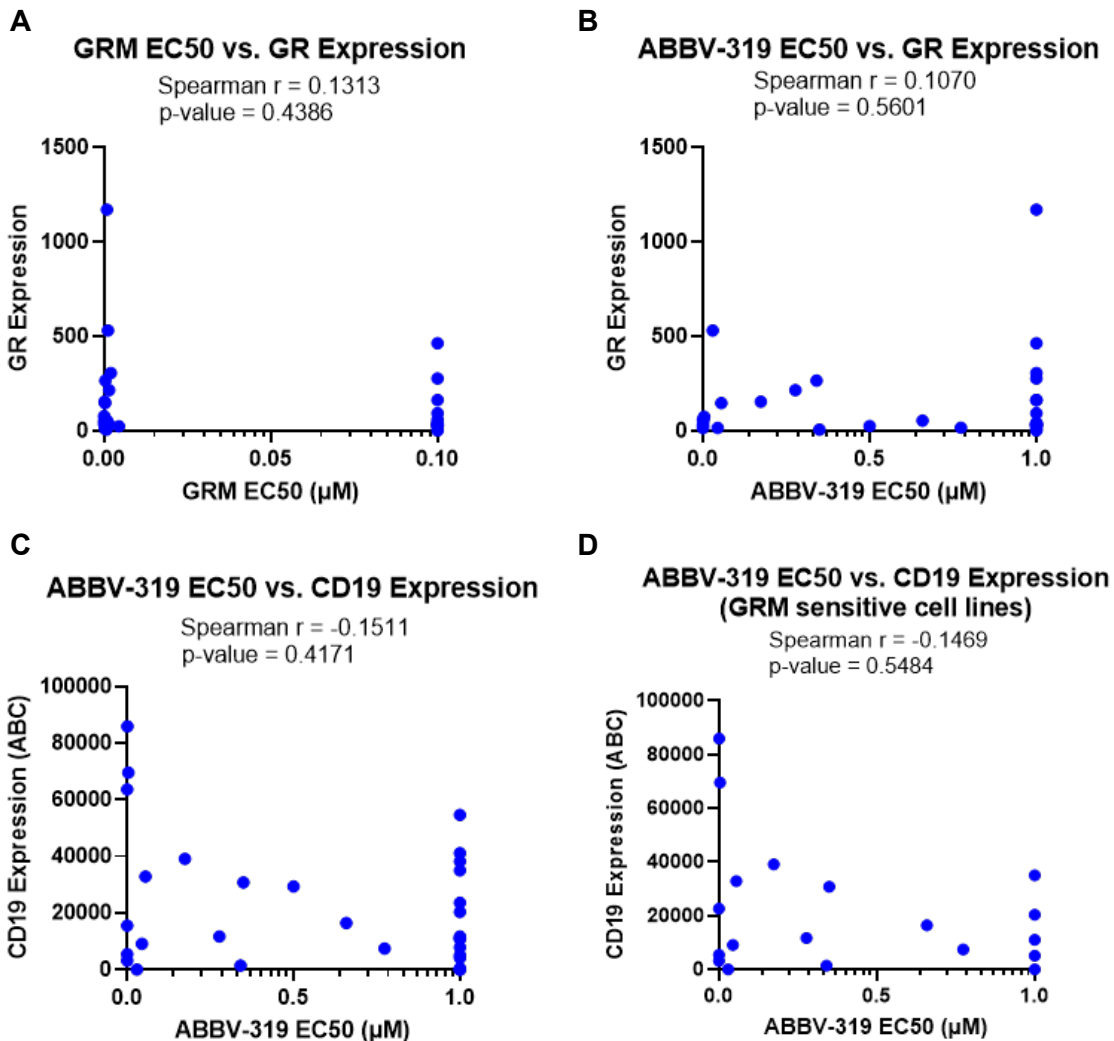

# Supplemental Figure 3

**A**

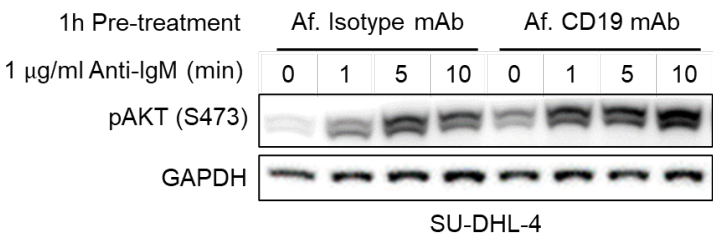

**B**

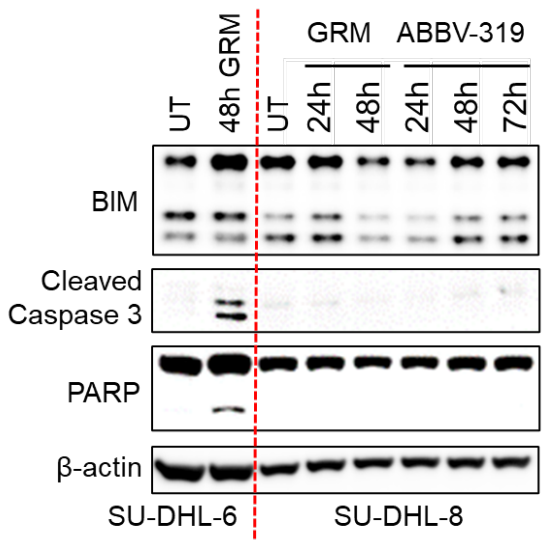

**C**

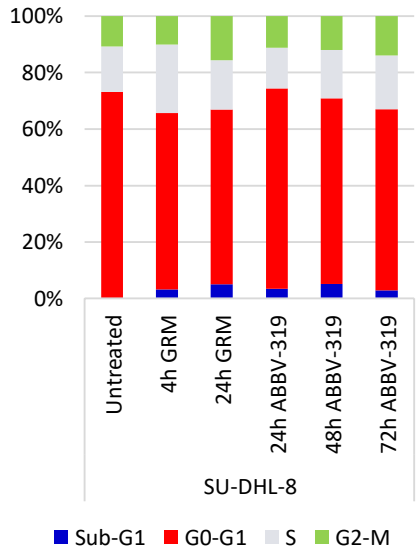

# Supplemental Figure 4

**A**

| Indication | Cell Line  | Mouse Strain |           | In Vivo Efficacy @ 15 mg/kg |            |
|------------|------------|--------------|-----------|-----------------------------|------------|
|            |            | NSG          | CB17 SCID | TGI Max (%)                 | TGD (days) |
| ALL        | RS4;11     | X            | X         | 100                         | >406       |
|            | SUP-B15    | X            |           | 100                         | >125       |
| DLBCL      | DB         |              | X         | 100                         | >139       |
|            | DoHH2      | X            | X         | 78                          | 79         |
|            | OCI-LY19   |              | X         | 96                          | 510        |
|            | KARPASS422 |              | X         | 97                          | >212       |

**B**

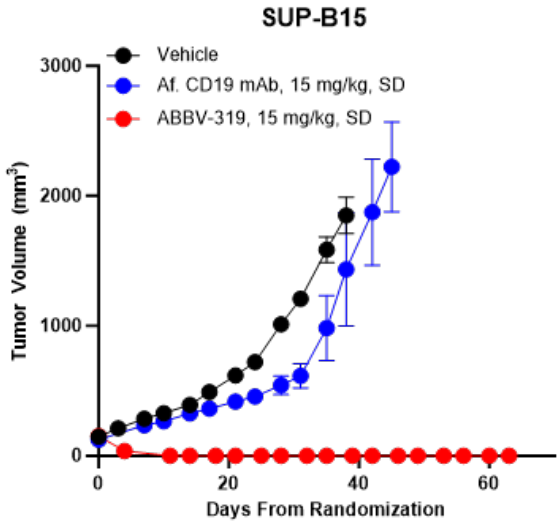

**C**

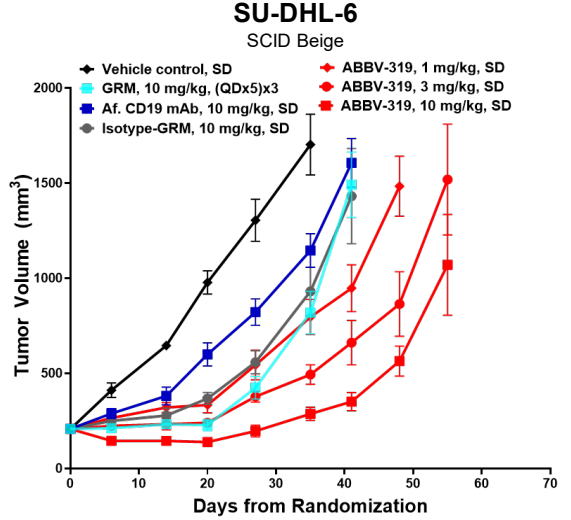

**D**

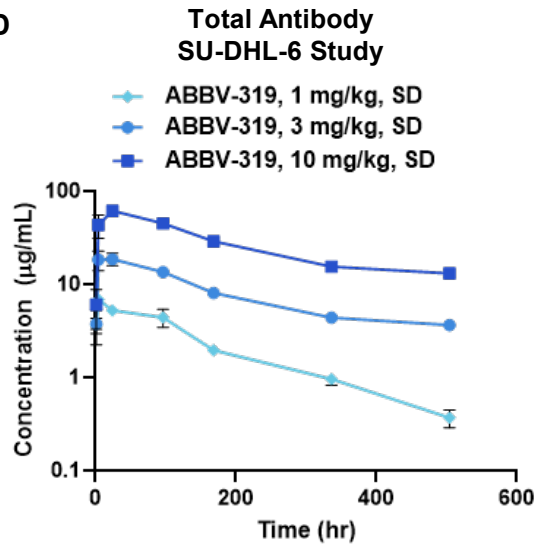



# Supplemental Figure 5

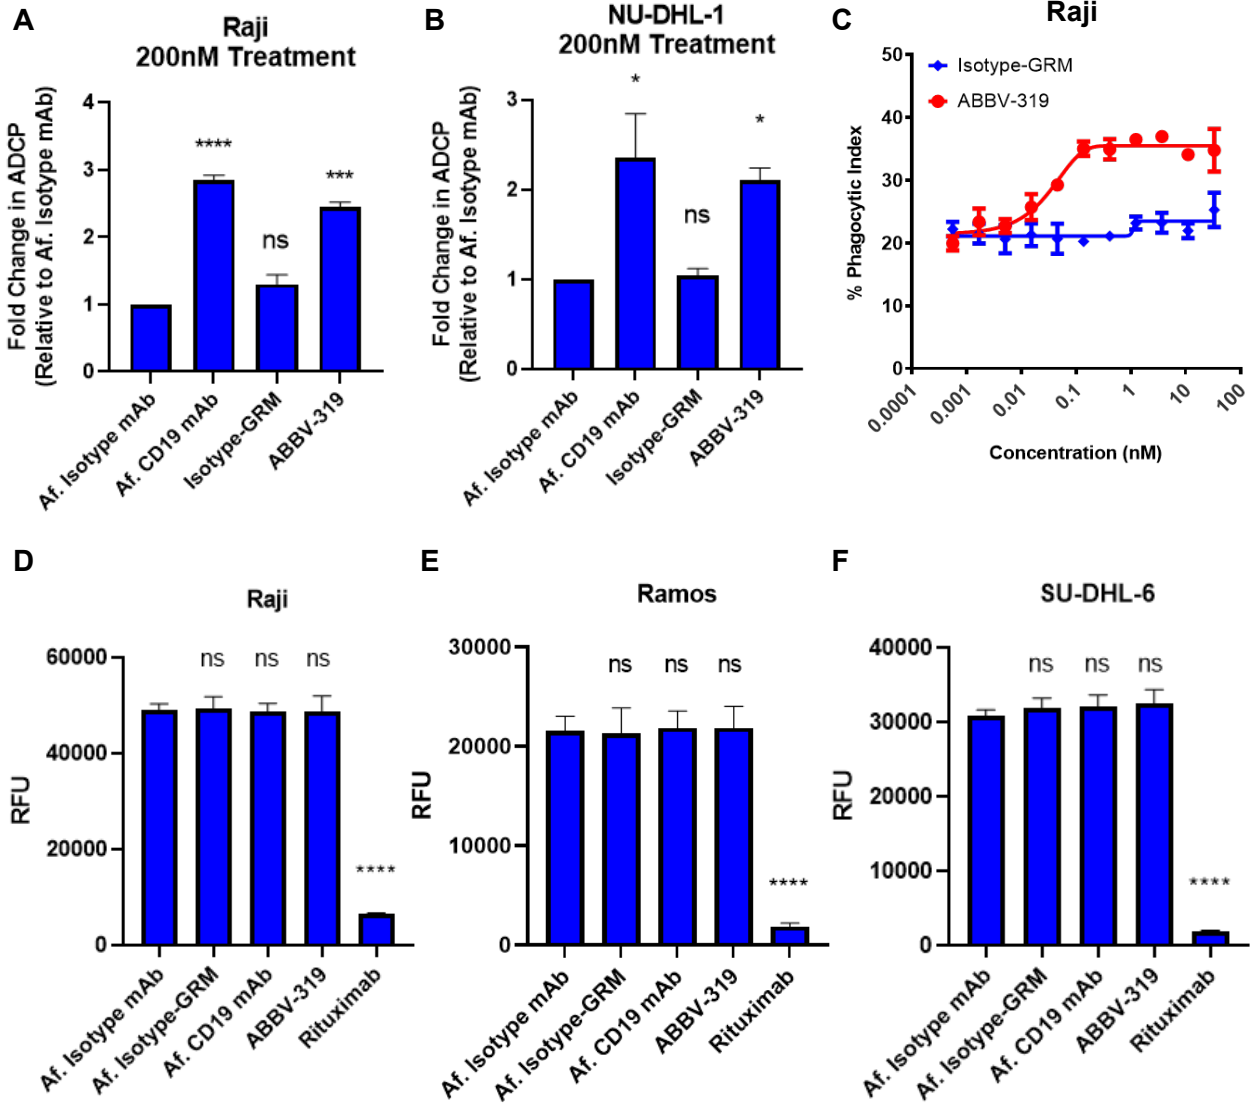

Supplement: BLOOD_BLD-2024-023849-mmc1.pdf [file BLOOD_BLD-2024-023849-mmc1.pdf]
